# Supplementary material
Source: MDPI journal article supplement (https://www.mdpi.com/1999-4907/12/11/1505)
Supplement: s1 [file s1 › forests-1395273-supplementary.pdf]

# Challenges in the Application of Dendrochemistry in Research on Historical Environmental Pollution in an Old Copper

**Table S1.** Evaluation of the significant difference between the mean values of the analysed trace elements (TEs) calculated for Industrial (Ind.) and Control site (n=28).

| TEs | Site    | Sum of ranks    | U <sup>1</sup> | P <sup>2</sup>   |
|-----|---------|-----------------|----------------|------------------|
| Ag  | Ind.    | -               | -              | -                |
|     | Control | nd <sup>3</sup> |                |                  |
| Al  | Ind.    | -               | -              | -                |
|     | Control | nd <sup>3</sup> |                |                  |
| Cd  | Ind.    | nd <sup>4</sup> | -              | -                |
|     | Control | nd <sup>4</sup> |                |                  |
| Co  | Ind.    | nd <sup>4</sup> | -              | -                |
|     | Control | nd <sup>4</sup> |                |                  |
| Cr  | Ind.    | 253.0           | 48.0           | <b>0.021</b>     |
|     | Control | 153.0           |                |                  |
| Cu  | Ind.    | 276.0           | 25.0           | <b>&lt;0.001</b> |
|     | Control | 130.0           |                |                  |
| Fe  | Ind.    | 274.0           | 27.0           | <b>0.001</b>     |
|     | Control | 132.0           |                |                  |
| Mn  | Ind.    | 301.0           | 0.0            | <b>&lt;0.001</b> |
|     | Control | 105.0           |                |                  |
| Ni  | Ind.    | 249.0           | 52.0           | <b>0.035</b>     |
|     | Control | 157.0           |                |                  |
| Pb  | Ind.    | 258.0           | 43.0           | <b>0.011</b>     |
|     | Control | 148.0           |                |                  |
| Zn  | Ind.    | 301.0           | 0.0            | <b>&lt;0.001</b> |
|     | Control | 105.0           |                |                  |

<sup>1</sup> U - Mann–Whitney U test

<sup>2</sup> Significant at  $P < 0.05$  (bold font)<sup>3</sup>

<sup>3</sup> Not detected
